# Supplementary material for: Specificity of Loxosceles α clade phospholipase D enzymes for choline-containing lipids: Role of a conserved aromatic cage
Source: PubMed Central journal article supplement (PMC8893692; doi:10.1371/journal.pcbi.1009871), 2022-02-18
Supplement: pcbi.1009871.s005.pdf [file pcbi.1009871.s005.pdf]

## Depth of Anchoring

**Table A. Anchoring depth of Li\_αIA1, Ll\_αIII1 and R44Y/S60Y St\_βIB1 on a pure POPC bilayer.** The depth represents the distance between the C-alpha atom of each residue and the upper phosphate plane. R1 and R2 stand for replica 1 and replica 2. Only residues with a relevant anchoring depth are indicated in this table.

| SSE  | Residue | Depth (Å) |      |          |      |                   |      |
|------|---------|-----------|------|----------|------|-------------------|------|
|      |         | Li_αIA1   |      | Ll_αIII1 |      | R44Y/S60Y St_βIB1 |      |
|      |         | R1        | R2   | R1       | R2   | R1                | R2   |
| β2α2 | 37      | 5.1       | 6.6  | 4.5      | 4.1  | 2.2               | 4.2  |
|      | 38      | 2.4       | 3.9  | 1.3      | 0.6  | 0.8               | 2.6  |
|      | 39      | 2.4       | 4.6  | 2.3      | 1.3  | 1.7               | 2.3  |
|      | 44      | 5.4       | 6.7  | 3.6      | 3.2  | 5.9               | 4.4  |
|      | 46      | 5.4       | 6.4  | 3.7      | 3.8  | 6.1               | 5.2  |
|      | 48      | 1.6       | 2.3  | 0.4      | 0.8  | 6.1               | 2.6  |
|      | 49      | -0.9      | -0.1 | -0.2     | 0.3  | 0.6               | 0.9  |
|      | 50      | -0.5      | 0.2  | 0.9      | 1.7  | -1.0              | 0.3  |
|      | 51      | 2.9       | 3.7  | 3.4      | 3.6  | 1.8               | 3.9  |
|      | 52      | 4.9       | 6.0  | 5.7      | 5.0  | 3.6               | 6.1  |
|      | 53      | 3.4       | 5.1  | 4.4      | 3.5  | 3.5               | 8.5  |
|      | 54      | 4.1       | 5.9  | 5.1      | 5.7  | 0.4               | 7.1  |
|      | 55      | 4.8       | 5.5  | 4.5      | 5.6  | 1.8               | 8.1  |
|      | 56      | 2.7       | 3.2  | 1.7      | 3.0  | 2.3               | 6.8  |
|      | 57      | 2.2       | 2.6  | 2.2      | 2.5  | 4.7               | 6.0  |
|      | 58      | 1.5       | 1.8  | -0.8     | -0.4 | 2.5               | 3.5  |
| 59   | 3.8     | 5.0       | 0.9  | 1.6      | 4.1  | 5.7               |      |
| 60   | 3.8     | 5.8       | 1.9  | 2.4      | 5.3  | 5.3               |      |
| β3α3 | 95      | 2.5       | 5.1  | 4.8      | 4.9  | 5.2               | 2.1  |
|      | 96      | 3.8       | 6.6  | 2.5      | 1.4  | 2.0               | 1.7  |
|      | 97      | 3.9       | 7.1  | 4.9      | 2.3  | 3.7               | 2.6  |
| β6α6 | 98      | 3.8       | 7.5  | 5.4      | 1.5  | 3.1               | 4.1  |
|      | 201     | 4.2       | 7.8  | 10.0     | 12.3 | 11.5              | 15.1 |
|      | 202     | 4.4       | 7.9  | 12.8     | 15.3 | 13.5              | 15.6 |

**Table B. Anchoring depth of Li\_αIA1 and LI\_αIII1 on a POPC:PSM:CHOL (70:20:10) bilayer.** The depth represents the distance between the C-alpha atom of each residue and the upper phosphate plane. R1 and R2 stand for replica 1 and replica 2. Only residues with a relevant anchoring depth are indicated in this table.

| SSE  | Residue | Depth (Å) |      |          |      |     |
|------|---------|-----------|------|----------|------|-----|
|      |         | Li_αIA1   |      | LI_αIII1 |      |     |
|      |         | R1        | R2   | R1       | R2   |     |
| β2α2 | 37      | 7.4       | 7.0  | 7.2      | 5.3  |     |
|      | 38      | 5.2       | 5.1  | 4.7      | 2.4  |     |
|      | 39      | 4.8       | 4.2  | 5.2      | 2.1  |     |
|      | 44      | 9.2       | 9.5  | 6.3      | 5.5  |     |
|      | 46      | 7.5       | 7.0  | 4.5      | 4.9  |     |
|      | 48      | 2.1       | 1.9  | 2.4      | 1.3  |     |
|      | 49      | -0.4      | -0.5 | 0.2      | -0.3 |     |
|      | 50      | -0.1      | -0.5 | 0.9      | 0.5  |     |
|      | 51      | 3.5       | 2.3  | 4.1      | 3.8  |     |
|      | 52      | 5.3       | 4.4  | 5.8      | 5.7  |     |
|      | 53      | 4.0       | 3.4  | 3.9      | 4.5  |     |
|      | 54      | 5.4       | 4.7  | 5.0      | 6.3  |     |
|      | 55      | 6.3       | 5.4  | 5.5      | 5.9  |     |
|      | 56      | 5.0       | 3.7  | 3.2      | 3.0  |     |
|      | 57      | 4.2       | 4.1  | 2.4      | 2.2  |     |
|      | 58      | 3.7       | 2.3  | 0.6      | 0.4  |     |
|      | 59      | 7.4       | 5.5  | 3.7      | 3.1  |     |
|      | 60      | 8.5       | 7.0  | 5.2      | 4.2  |     |
|      | β3α3    | 95        | 3.0  | 3.0      | 6.3  | 3.2 |
|      |         | 96        | 1.7  | 2.1      | 4.1  | 1.7 |
| 97   |         | 3.4       | 3.6  | 6.4      | 3.8  |     |
| 98   |         | 3.4       | 4.1  | 6.3      | 2.6  |     |
| β6α6 | 201     | 3.3       | 3.0  | 8.8      | 8.1  |     |
|      | 202     | 3.4       | 4.8  | 7.4      | 10.7 |     |

**Table C. Anchoring depth of St\_βIB1 on a POPC:POPE (50:50) bilayer.** The depth represents the distance between the C-alpha atom of each residue and the upper phosphate plane. R1 and R2 stand for replica 1 and replica 2. Only residues with a relevant anchoring depth are indicated in this table.

| SSE  | residue | Depth |      |
|------|---------|-------|------|
|      |         | R1    | R2   |
| β2α2 | H47     | 10.7  | 11.0 |
|      | G48     | 10.0  | 10.0 |
|      | V49     | 6.8   | 7.9  |
|      | P50     | 4.4   | 6.7  |
|      | C51     | 4.4   | 5.1  |
|      | D52     | 3.7   | 4.5  |
|      | C53     | 0.0   | 0.9  |
|      | F54     | -1.8  | -1.3 |
|      | R55     | 0.9   | 1.2  |
|      | S56     | 2.3   | 2.5  |
|      | C57     | 4.9   | 4.7  |
|      | T58     | 6.4   | 5.7  |
|      | R59     | 9.7   | 7.7  |
|      | β6      | D192  | 11.9 |
| G193 |         | 8.7   | 10.5 |
| I194 |         | 6.0   | 7.7  |
| β6α6 | T195    | 4.2   | 5.4  |
|      | N196    | 2.7   | 3.2  |
|      | C197    | -0.9  | -0.2 |
|      | L198    | -1.0  | -0.6 |
|      | P199    | 0.8   | 0.6  |
|      | R200    | 3.8   | 5.0  |
|      | D201    | 4.3   | 6.3  |
|      | D202    | 7.4   | 9.2  |
| α6   | N203    | 8.6   | 11.2 |
|      | R204    | 11.7  | 13.7 |
| β7α7 | W226    | 10.7  | 11.0 |
|      | S227    | 8.6   | 8.5  |
|      | I228    | 6.4   | 6.1  |
|      | D229    | 5.5   | 3.4  |
|      | K230    | 2.8   | 1.9  |
| α7   | E231    | 4.3   | 3.2  |
|      | S232    | 2.8   | 2.5  |
|      | S233    | 4.3   | 4.4  |
|      | I234    | 7.6   | 7.4  |
|      | E235    | 7.7   | 7.1  |
|      | N236    | 7.0   | 7.5  |
|      | A237    | 9.9   | 10.6 |
