# Supplementary material for: Specificity of Loxosceles α clade phospholipase D enzymes for choline-containing lipids: Role of a conserved aromatic cage
Source: PubMed Central journal article supplement (PMC8893692; doi:10.1371/journal.pcbi.1009871), 2022-02-18
Supplement: pcbi.1009871.s006.pdf [file pcbi.1009871.s006.pdf]

## Liposome binding assay data

**Table A. Data from three individual experiments for wild-type St $\beta$ IB1 and the R44Y/S60Y variant binding to 1:1 sphingomyelin:cholesterol liposomes.** Numbers indicate the percentage of protein found in the pellet fraction. Note that despite some run-to-run variation in absolute numbers, the R44Y/S60Y variant shows consistently higher levels of protein pelleted by the liposomes, relative to the wild type. Details of experimental conditions and analysis are described in Methods.

|                 | - Liposomes | + Liposomes | Difference | R44Y/S60Y minus wild-type |
|-----------------|-------------|-------------|------------|---------------------------|
| Wild type run 1 | 10          | 33          | 23         |                           |
| R44Y/S60Y run 1 | 7           | 43          | 36         | 13                        |
| Wild type run 2 | 16          | 26          | 10         |                           |
| R44Y/S60Y run 2 | 7           | 34          | 27         | 17                        |
| Wild type run 3 | 10          | 22          | 12         |                           |
| R44Y/S60Y run 3 | 8           | 30          | 22         | 10                        |
