# Supplementary material for: Specificity of Loxosceles α clade phospholipase D enzymes for choline-containing lipids: Role of a conserved aromatic cage
Source: PubMed Central journal article supplement (PMC8893692; doi:10.1371/journal.pcbi.1009871), 2022-02-18
Supplement: pcbi.1009871.s007.pdf [file pcbi.1009871.s007.pdf]

## Conformations of POPC headgroups

**Table A. Average angles between P-N vectors and the membrane normal for POPC lipids bound or unbound to the aromatic cage.**

| System | Number of "free"<br>PC lipids | Unbound<br>(degrees) |         | Bound<br>(degrees) |         |
|--------|-------------------------------|----------------------|---------|--------------------|---------|
|        |                               | R1                   | R2      | R1                 | R2      |
| 1      | 255                           | 63 ± 20              | 71 ± 25 | 50 ± 20            | 60 ± 24 |
| 2      | 255                           | 67 ± 20              | 70 ± 26 | 55 ± 17            | 62 ± 28 |
| 5      | 179                           | 70 ± 24              | 69 ± 28 | 61 ± 22            | 63 ± 23 |
| 6      | 179                           | 74 ± 28              | 75 ± 29 | 68 ± 26            | 71 ± 20 |
| 9      | 127                           | -                    | 68 ± 25 | -                  | 62 ± 30 |
